# Supplementary material for: Phylogeography and Wolbachia Infections Reveal Postglacial Recolonization Routes of the Parthenogenetic Plant Louse Cacopsylla myrtilli (W. Wagner 1947), (Hemiptera, Psylloidea)
Source: Hindawi journal article supplement (doi:10.1155/2022/5458633), 2022-07-08
Supplement: f1 [file 5458633.f1.pdf]

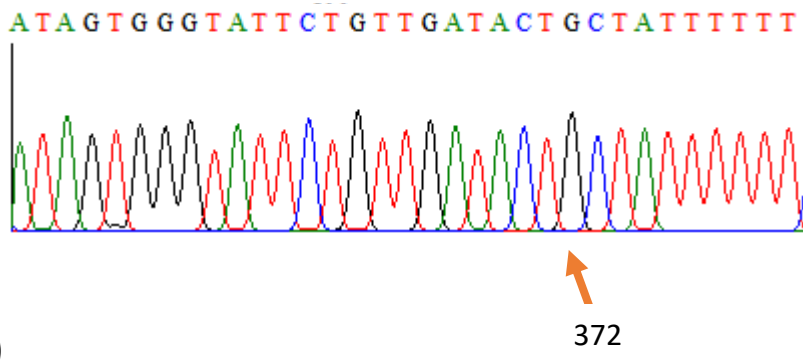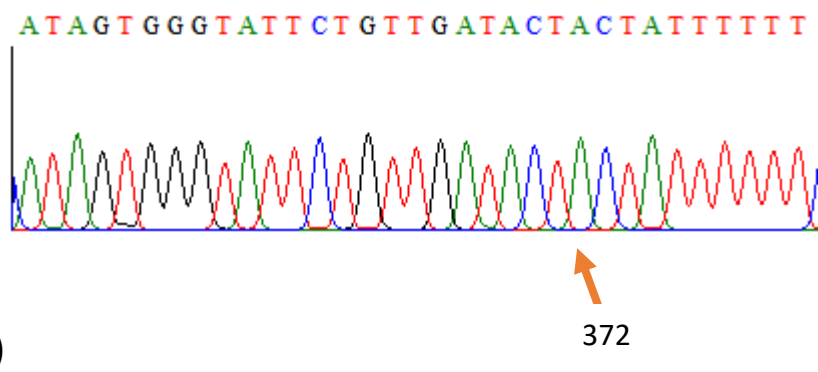

**Figure S1.** An example of visual conformation of nucleotide substitution. **(a)** Main haplotype sequence H3 showing G at site 372. **(b)** A derived haplotype H36 (H3\_372G>A), showing A at site 372.
