# Supplementary material for: Phylogeography and Wolbachia Infections Reveal Postglacial Recolonization Routes of the Parthenogenetic Plant Louse Cacopsylla myrtilli (W. Wagner 1947), (Hemiptera, Psylloidea)
Source: Hindawi journal article supplement (doi:10.1155/2022/5458633), 2022-07-08
Supplement: f2 [file 5458633.f2.pdf]

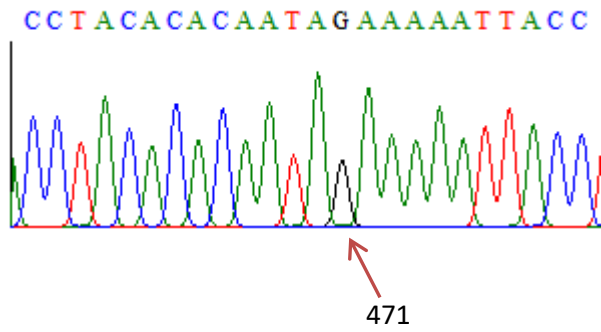

Homoplasmic sequence from Abisko, Björkliden Fjället.

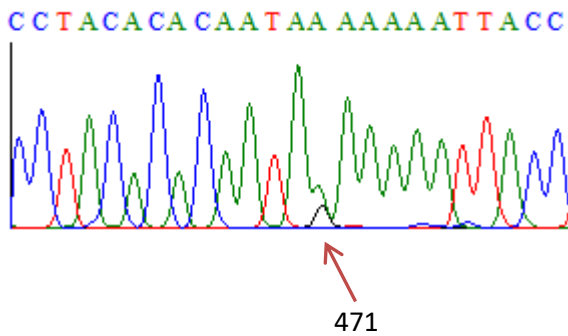

Heteroplasmic sequence from Abisko, Björkliden Fjället.

**(a)** *C. myrtilli*, Abisko, Björkliden Fjället, Sweden, site 471.

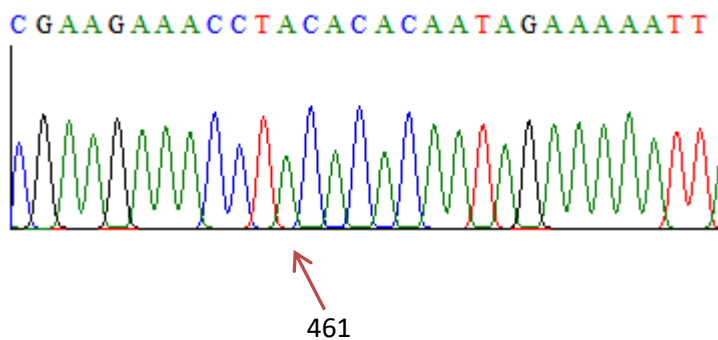

Homoplasmic sequence from Krušné Hory.

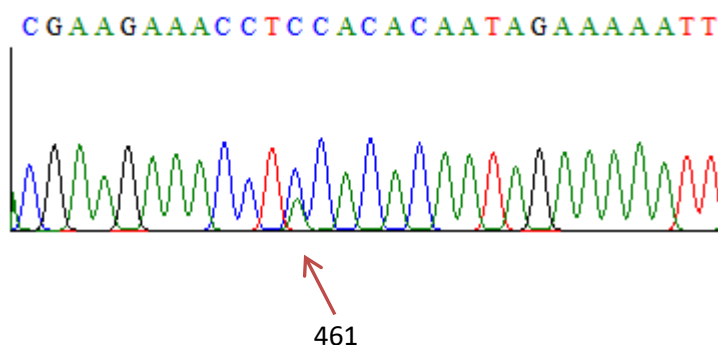

Heteroplasmic sequence from Krušné Hory.

**(b)** *C. myrtilli*, Krušné Hory Czech Republic, site 461.

**Figure S2.** Examples of heteroplasmic sites in *COI* sequence in *Cacopsylla myrtilli*. **(a)** A homoplasmic sequence and G/A heteroplasmy at site 471 in a specimen from Abisko, Björkliden Fjället, Sweden **(b)** Homoplasmic sequence and A/C heteroplasmy at site 461 in a specimen from Krušné Hory Czech Republic.
