# Supplementary material for: Phylogeography and Wolbachia Infections Reveal Postglacial Recolonization Routes of the Parthenogenetic Plant Louse Cacopsylla myrtilli (W. Wagner 1947), (Hemiptera, Psylloidea)
Source: Hindawi journal article supplement (doi:10.1155/2022/5458633), 2022-07-08
Supplement: f4 [file 5458633.f4.txt]

[Alignment S1. Haplotype name, corresponding protein accession number, and amino acid sequence.]

>H1 AGU38831.1
GVWSGLLGLSLSMIIRLELSQSSPVLMNDQIYNTIVTSHAFIMIFFMTMPIIIGGFGNWLVPLMIGAPDMAFPRLNNLSFWLLIPSLYLLLMSSLIDQGVGTGWTVYPPLSNSMFHSGYSVDTAIFSLHLAGISSILGAINFITTIINMRSNLHTMEKLPLFVWSVLITAFLLLLALPVLAGAITMLLTDRNMNTTFFDPAGGGDPLLYQHL
>H2 AGU38830.1
GVWSGLLGLSLSMIIRLELSQSSPVLMNDQIYNTIVTSHAFIMIFFMTMPIIIGGFGNWLVPLMIGAPDMAFPRLNNLSFWLLIPSLYLLLMSSLIDQGVGTGWTVYPPLSNSMFHSGYSVDTAIFSLHLAGISSILGAINFITTIINMRSNLHTMEKLPLFVWSVLITAFLLLLALPVLAGAITMLLTDRNMNTTFFDPAGGGDPLLYQHL
>H3 AGU38833.1
GVWSGLLGLSLSMIIRLELSQSSPVLMNDQIYNTIVTSHAFIMIFFMTMPIIIGGFGNWLVPLMIGAPDMAFPRLNNLSFWLLIPSLYLLLMSSLIDQGVGTGWTVYPPLSNSMFHSGYSVDTAIFSLHLAGISSILGAINFITTIINMRSNLHTMEKLPLFVWSVLITAFLLLLALPVLAGAITMLLTDRNMNTTFFDPAGGGDPLLYQHL
>H4 UAX27050.1
GVWSGLLGLSLSMIIRLELSQSSPVLMNDQIYNTIVTSHAFIMIFFMTMPIIIGGFGNWLVPLMIGAPDMAFPRLNNLSFWLLIPSLYLLLMSSLIDQGVGTGWTVYPPLSNSMFHSGYSVDTAIFSLHLAGISSILGAINFITTIINMRSNLHTMEKLPLFVWSVLITAFLLLLALPVLAGAITMLLTDRNMNTTFFDPAGGGDPLLYQHL
>H5 UAX27051.1
GVWSGLLGLSLSMIIRLELSQSSPVLMNDQIYNTIVTSHAFIMIFFMTMPIIIGGFGNWLVPLMIGAPDMAFPRLNNLSFWLLIPSLYLLLMSSLIDQGVGTGWTVYPPLSNSMFHSGYSVDTAIFSLHLAGISSILGAINFITTIINMRSNLHTMEKLPLFVWSVLITAFLLLLALPVLAGAITMLLTDRNMNTTFFDPAGGGDPLLYQHL
>H6 UAX27052.1
GVWSGLLGLSLSMIIRLELSQSSPVLMNDQIYNTIVTSHAFIMIFFMTMPIIIGGFGNWLVPLMIGAPDMAFPRLNNLSFWLLIPSLYLLLMSSLIDQGVGTGWTVYPPLSNSMFHSGYSVDTAIFSLHLAGISSILGAINFITTIINMRSNLHTMEKLPLFVWSVLITAFLLLLALPVLAGAITMLLTDRNMNTTFFDPAGGGDPLLYQHL
>H7 UAX27053.1
GVWSGLLGLSLSMIIRLELSQSSPVLMNDQIYNTIVTSHAFIMIFFMTMPIIIGGFGNWLVPLMIGAPDMAFPRLNNLSFWLLIPSLYLLLMSSLIDQGVGTGWTVYPPLSNSMFHSGYSVDTAIFSLHLAGISSILGAINFITTIINMRSNLHTMEKLPLFVWSVLITAFLLLLALPVLAGAITMLLTDRNMNTTFFDPAGGGDPLLYQHL
>H8 UAX27054.1
GVWSGLLGLSLSMIIRLELSQSSPVLMNDQIYNTIVTSHAFIMIFFMTMPIIIGGFGNWLVPLMIGAPDMAFPRLNNLSFWLLIPSLYLLLMSSLIDQGVGTGWTVYPPLSNSMFHSGYSVDTAIFSLHLAGISSILGAINFITTIINMRSNLHTMEKLPLFVWSVLITAFLLLLALPVLAGAITMLLTDRNMNTTFFDPAGGGDPLLYQHL
>H9 UAX27055.1
GVWSGLLGLSLSMIIRLELSQSSPVLMNDQIYNTIVTSHAFIMIFFMTMPIIIGGFGNWLVPLMIGAPDMAFPRLNNLSFWLLIPSLYLLLMSSLIDQGVGTGWTVYPPLSNSMFHSGYSVDTAIFSLHLAGISSILGAINFITTIINMRSNLHTMEKLPLFVWSVLITAFLLLLALPVLAGAITMLLTDRNMNTTFFDPAGGGDPLLYQHL
>H10 UAX27056.1
GVWSGLLGLSLSMIIRLELSQSSPVLMNDQIYNTIVTSHAFIMIFFMTMPIIIGGFGNWLVPLMIGAPDMAFPRLNNLSFWLLIPSLYLLLMSSLIDQGVGTGWTVYPPLSNSMFHSGYSVDTAIFSLHLAGISSILGAINFITTIINMRSNLHTMEKLPLFVWSVLITAFLLLLALPVLAGAITMLLTDRNMNTTFFDPAGGGDPLLYQHL
>H12 UAX27058.1
GVWSGLLGLSLSMIIRLELSQSSPVLMNDQIYNTIVTSHAFIMIFFMTMPIIIGGFGNWLVPLMIGAPDMAFPRLNNLSFWLLIPSLYLLLMSSLIDQGVGTGWTVYPPLSNSMFHSGYSVDTAIFSLHLAGISSILGAINFITTIINMRSNLHTMEKLPLFVWSVLITAFLLLLALPVLAGAITMLLTDRNMNTTFFDPAGGGDPLLYQHL
>H13 AGU38834.1
GVWSGLLGLSLSMIIRLELSQSSPVLMNDQIYNTIVTSHAFIMIFFMTMPIIIGGFGNWLVPLMIGAPDMAFPRLNNLSFWLLIPSLYLLLMSSLIDQGVGTGWTVYPPLSNSMFHSGYSVDTAIFSLHLAGISSILGAINFITTIINMRSNLHTMEKLPLFVWSVLITAFLLLLALPVLAGAITMLLTDRNMNTTFFDPAGGGDPLLYQHL
>H14 UAX27059.1
GVWSGLLGLSLSMIIRLELSQSSPVLMNDQIYNTIVTSHAFIMIFFMTMPIIIGGFGNWLVPLMIGAPDMAFPRLNNLSFWLLIPSLYLLLMSSLIDQGVGTGWTVYPPLSNSMFHSGYSVDTAIFSLHLAGISSILGAINFITTIINMRSNLHTMEKLPLFVWSVLITAFLLLLALPVLAGAITMLLTDRNMNTTFFDPAGGGDPLLYQHL
>H15 UAX27060.1
GVWSGLLGLSLSMIIRLELSQSSPVLMNDQIYNTIVTSHAFIMIFFMTMPIIIGGFGNWLVPLMIGAPDMAFPRLNNLSFWLLIPSLYLLLMSSLIDQGVGTGWTVYPPLSNSMFHSGYSVDTAIFSLHLAGISSILGAINFITTIINMRSNLHTMEKLPLFVWSVLITAFLLLLALPVLAGAITMLLTDRNMNTTFFDPAGGGDPLLYQHL
>H16 UAX27061.1
GVWSGLLGLSLSMIIRLELSQSSPVLMNDQIYNTIVTSHAFIMIFFMTMPIIIGGFGNWLVPLMIGAPDMAFPRLNNLSFWLLIPSLYLLLMSSLIDQGVGTGWTVYPPLSNSMFHSGYSVDTAIFSLHLAGISSILGAINFITTIINMRSNLHTMEKLPLFVWSVLITAFLLLLALPVLAGAITMLLTDRNMNTTFFDPAGGGDPLLYQHL
>H17 UAX27062.1
GVWSGLLGLSLSMIIRLELSQSSPVLMNDQIYNTIVTSHAFIMIFFMTMPIIIGGFGNWLVPLMIGAPDMAFPRLNNLSFWLLIPSLYLLLMSSLIDQGVGTGWTVYPPLSNSMFHSGYSVDTAIFSLHLAGISSILGAINFITTIINMRSNLHTMEKLPLFVWSVLITAFLLLLALPVLAGAITMLLTDRNMNTTFFDPAGGGDPLLYQHL
>H18 AGU38832.1
GVWSGLLGLSLSMIIRLELSQSSPVLMNDQIYNTIVTSHAFIMIFFMTMPIIIGGFGNWLVPLMIGAPDMAFPRLNNLSFWLLIPSLYLLLMSSLIDQGVGTGWTVYPPLSNSMFHSGYSVDTAIFSLHLAGISSILGAINFITTIINMRSNLHTMEKLPLFVWSVLITAFLLLLALPVLAGAITMLLTDRNMNTTFFDPAGGGDPLLYQHL
>H19 UAX27063.1
GVWSGLLGLSLSMIIRLELSQSSPVLMNDQIYNTIVTSHAFIMIFFMTMPIIIGGFGNWLVPLMIGAPDMAFPRLNNLSFWLLIPSLYLLLMSSLIDQGVGTGWTVYPPLSNSMFHSGYSVDTAIFSLHLAGISSILGAINFITTIINMRSNLHTMEKLPLFVWSVLITAFLLLLALPVLAGAITMLLTDRNMNTTFFDPAGGGDPLLYQHL
>H20 UAX27064.1
GVWSGLLGLSLSMIIRLELSQSSPVLMNDQIYNTIVTSHAFIMIFFMTMPIIIGGFGNWLVPLMIGAPDMAFPRLNNLSFWLLIPSLYLLLMSSLIDQGVGTGWTVYPPLSNSMFHSGYSVDTAIFSLHLAGISSILGAINFITTIINMRSNLHTMEKLPLFVWSVLITAFLLLLALPVLAGAITMLLTDRNMNTTFFDPAGGGDPLLYQHL
>H23 UAX27067.1
GVWSGLLGLSLSMIIRLELSQSSPVLMNDQIYNTIVTSHAFIMIFFMTMPIIIGGFGNWLVPLMIGAPDMAFPRLNNLSFWLLIPSLYLLLMSSLIDQGVGTGWTVYPPLSNSMFHSGYSVDTAIFSLHLAGISSILGAINFITTIINMRSNLHTMEKLPLFVWSVLITAFLLLLALPVLAGAITMLLTDRNMNTTFFDPAGGGDPLLYQHL
>H24 UAX27068.1
GVWSGLLGLSLSMIIRLELSQSSPVLMNDQIYNTIVTSHAFIMIFFMTMPIIIGGFGNWLVPLMIGAPDMAFPRLNNLSFWLLIPSLYLLLMSSLIDQGVGTGWTVYPPLSNSMFHSGYSVDTAIFSLHLAGISSILGAINFITTIINMRSNLHTMEKLPLFVWSVLITAFLLLLALPVLAGAITMLLTDRNMNTTFFDPAGGGDPLLYQHL
>H25 UAX27069.1
GVWSGLLGLSLSMIIRLELSQSSPVLMNDQIYNTIVTSHAFIMIFFMTMPIIIGGFGNWLVPLMIGAPDMAFPRLNNLSFWLLIPSLYLLLMSSLIDQGVGTGWTVYPPLSNSMFHSGYSVDTAIFSLHLAGISSILGAINFITTIINMRSNLHTMEKLPLFVWSVLITAFLLLLALPVLAGAITMLLTDRNMNTTFFDPAGGGDPLLYQHL
>H26 UAX27070.1
GVWSGLLGLSLSMIIRLELSQSSPVLMNDQIYNTIVTSHAFIMIFFMTMPIIIGGFGNWLVPLMIGAPDMAFPRLNNLSFWLLIPSLYLLLMSSLIDQGVGTGWTVYPPLSNSMFHSGYSVDTAIFSLHLAGISSILGAINFITTIINMRSNLHTMEKLPLFVWSVLITAFLLLLALPVLAGAITMLLTDRNMNTTFFDPAGGGDPLLYQHL
>H29 UAX27073.1
GVWSGLLGLSLSMIIRLELSQSSPVLMNDQIYNTIVTSHAFIMIFFMTMPIIIGGFGNWLVPLMIGAPDMAFPRLNNLSFWLLIPSLYLLLMSSLIDQGVGTGWTVYPPLSNSMFHSGYSVDTAIFSLHLAGISSILGAINFITTIINMRSNLHTMEKLPLFVWSVLITAFLLLLALPVLAGAITMLLTDRNMNTTFFDPAGGGDPLLYQHL
>H30 AGU38835.1
GVWSGLLGLSLSMIIRLELSQSSPVLMNDQIYNTIVTSHAFIMIFFMTMPIIIGGFGNWLVPLMIGAPDMAFPRLNNLSFWLLIPSLYLLLMSSLIDQGVGTGWTVYPPLSNSMFHSGYSVDTAIFSLHLAGISSILGAINFITTIINMRSNLHTMEKLPLFVWSVLITAFLLLLALPVLAGAITMLLTDRNMNTTFFDPAGGGDPLLYQHL
>H31 AGU38836.1
GVWSGLLGLSLSMIIRLELSQSSPVLMNDQIYNTIVTSHAFIMIFFMTMPIIIGGFGNWLVPLMIGAPDMAFPRLNNLSFWLLIPSLYLLLMSSLIDQGVGTGWTVYPPLSNSMFHSGYSVDTAIFSLHLAGISSILGAINFITTIINMRSNLHTMEKLPLFVWSVLITAFLLLLALPVLAGAITMLLTDRNMNTTFFDPAGGGDPLLYQHL
>H32 UAX27074.1
GVWSGLLGLSLSMIIRLELSQSSPVLMNDQIYNTIVTSHAFIMIFFMTMPIIIGGFGNWLVPLMIGAPDMAFPRLNNLSFWLLIPSLYLLLMSSLIDQGVGTGWTVYPPLSNSMFHSGYSVDTAIFSLHLAGISSILGAINFITTIINMRSNLHTMEKLPLFVWSVLITAFLLLLALPVLAGAITMLLTDRNMNTTFFDPAGGGDPLLYQHL
>H33 UAX27075.1
GVWSGLLGLSLSMIIRLELSQSSPVLMNDQIYNTIVTSHAFIMIFFMTMPIIIGGFGNWLVPLMIGAPDMAFPRLNNLSFWLLIPSLYLLLMSSLIDQGVGTGWTVYPPLSNSMFHSGYSVDTAIFSLHLAGISSILGAINFITTIINMRSNLHTMEKLPLFVWSVLITAFLLLLALPVLAGAITMLLTDRNMNTTFFDPAGGGDPLLYQHL
>H35 UAX27077.1
GVWSGLLGLSLSMIIRLELSQSSPVLMNDQIYNTIVTSHAFIMIFFMTMPIIIGGFGNWLVPLMIGAPDMAFPRLNNLSFWLLIPSLYLLLMSSLIDQGVGTGWTVYPPLSNSMFHSGYSVDTAIFSLHLAGISSILGAINFITTIINMRSNLHTMEKLPLFVWSVLITAFLLLLALPVLAGAITMLLTDRNMNTTFFDPAGGGDPLLYQHL
>H37 UAX27079.1
GVWSGLLGLSLSMIIRLELSQSSPVLMNDQIYNTIVTSHAFIMIFFMTMPIIIGGFGNWLVPLMIGAPDMAFPRLNNLSFWLLIPSLYLLLMSSLIDQGVGTGWTVYPPLSNSMFHSGYSVDTAIFSLHLAGISSILGAINFITTIINMRSNLHTMEKLPLFVWSVLITAFLLLLALPVLAGAITMLLTDRNMNTTFFDPAGGGDPLLYQHL
>H38 UAX27080.1
GVWSGLLGLSLSMIIRLELSQSSPVLMNDQIYNTIVTSHAFIMIFFMTMPIIIGGFGNWLVPLMIGAPDMAFPRLNNLSFWLLIPSLYLLLMSSLIDQGVGTGWTVYPPLSNSMFHSGYSVDTAIFSLHLAGISSILGAINFITTIINMRSNLHTMEKLPLFVWSVLITAFLLLLALPVLAGAITMLLTDRNMNTTFFDPAGGGDPLLYQHL
>H40 UAX27082.1
GVWSGLLGLSLSMIIRLELSQSSPVLMNDQIYNTIVTSHAFIMIFFMTMPIIIGGFGNWLVPLMIGAPDMAFPRLNNLSFWLLIPSLYLLLMSSLIDQGVGTGWTVYPPLSNSMFHSGYSVDTAIFSLHLAGISSILGAINFITTIINMRSNLHTMEKLPLFVWSVLITAFLLLLALPVLAGAITMLLTDRNMNTTFFDPAGGGDPLLYQHL
>H11 UAX27057.1
GVWSGLLGLSLSMIIRLELSQSSPVLMNDQIYNTIVTSHAFIMIFFMTMPIIIGGFGNWLVPLMIGAPDMAFPRLNNLSFWLLIPSLYLLLMSSLIDQGVGTGWTAYPPLSNSMFHSGYSVDTAIFSLHLAGISSILGAINFITTIINMRSNLHTMEKLPLFVWSVLITAFLLLLALPVLAGAITMLLTDRNMNTTFFDPAGGGDPLLYQHL
>H21 UAX27065.1
GVWSGLLGLSLSMIIRLELSQSSPVLMNDQIYNTIVTSHAFIMIFFMTMPIIIGGFGNWLIPLMIGAPDMAFPRLNNLSFWLLIPSLYLLLMSSLIDQGVGTGWTVYPPLSNSMFHSGYSVDTAIFSLHLAGISSILGAINFITTIINMRSNLHTMEKLPLFVWSVLITAFLLLLALPVLAGAITMLLTDRNMNTTFFDPAGGGDPLLYQHL
>H22 UAX27066.1
GVWSGLLGLSLSMIIRLELSQSSPVLMNDQIYNTIVTSHAFIMIFFMTMPIIIGGFGNWLVPLMIGAPDMAFPRLNNLSFWLLIPSLYLLLMSSLIDQGVGTGWTVYPPLSNSMFHSGYSVDTAIFSLHLAGISSILGAINFITTIINMRSNLHTMEKLPLFVWSVMITAFLLLLALPVLAGAITMLLTDRNMNTTFFDPAGGGDPLLYQHL
>H27 UAX27071.1
GVWSGLLGLSLSMIIRLELSQSSPVLMNDQIYNTIVTSHAFIMIFFMTMPIIIGGFGNWLVPLMIGAPDMAFPRLNNLSFWLLIPSLYLLLMSSLIDQGVGTGWTVYPPLSNSMFHSGYSVDTAIFSLHLAGISSILGAINFITTIINMRSNLHTMEKSPLFVWSVLITAFLLLLALPVLAGAITMLLTDRNMNTTFFDPAGGGDPLLYQHL
>H28 UAX27072.1
GVWSGLLGLSLSMIIRLELSESSPVLMNDQIYNTIVTSHAFIMIFFMTMPIIIGGFGNWLVPLMIGAPDMAFPRLNNLSFWLLIPSLYLLLMSSLIDQGVGTGWTVYPPLSNSMFHSGYSVDTAIFSLHLAGISSILGAINFITTIINMRSNLHTMEKLPLFVWSVLITAFLLLLALPVLAGAITMLLTDRNMNTTFFDPAGGGDPLLYQHL
>H34 UAX27076.1
GVWSGLLGLSLSMIIRLELSQSSPVLMNDQIYNTIVTSHAFIMIFFMTMPIIIGGFGNWLVPLMIGAPDMAFPRLNNLSFWLLIPSLYLLLMSSLIDQGVGTGWTAYPPLSNSMFHSGYSVDTAIFSLHLAGISSILGAINFITTIINMRSNLHTMEKLPLFVWSVLITAFLLLLALPVLAGAITMLLTDRNMNTTFFDPAGGGDPLLYQHL
>H36 UAX27078.1
GVWSGLLGLSLSMIIRLELSQSSPVLMNDQIYNTIVTSHAFIMIFFMTMPIIIGGFGNWLVPLMIGAPDMAFPRLNNLSFWLLIPSLYLLLMSSLIDQGVGTGWTVYPPLSNSMFHSGYSVDTTIFSLHLAGISSILGAINFITTIINMRSNLHTMEKLPLFVWSVLITAFLLLLALPVLAGAITMLLTDRNMNTTFFDPAGGGDPLLYQHL
>H 39 UAX27081.1
GVWSGLLGLSLSMIIRLELSQSSPVLMNDQIYNTIVTSHAFIMIFFMTMPIIIGGFGNWLVPLMIGAPDMAFPRLNNLSFWLLIPSLYLLLMSSLIDQGVGTGWTVYPPLSNSMFHSGYSVDTAIFSLHLAGISSILGAINFITTIINMRSNLHKMEKLPLFVWSVLITAFLLLLALPVLAGAITMLLTDRNMNTTFFDPAGGGDPLLYQHL
